# Supplementary material for: Adaptation Evolution and Phylogenetic Analyses of Species in Chinese Allium Section Pallasia and Related Species Based on Complete Chloroplast Genome Sequences
Source: Hindawi journal article supplement (doi:10.1155/2020/8542797), 2020-01-01
Supplement: f1 [file 8542797.f1.pdf]

Table S1. The accession number and collecting locations of genomes in this study, genome of *Allium macrostemon* was sequenced in our previous study.

| Name                           | Accession | Locality                 | Altitude(m) | Voucher Specimen |
|--------------------------------|-----------|--------------------------|-------------|------------------|
| <i>Allium caeruleum</i>        | MN648630  | Urumqi, Xinjiang         | 900         | XFM20180607-1    |
| <i>Allium delicatulum</i>      | MN648631  | Urumqi, Xinjiang         | 1700        | XFM20180612-1    |
| <i>Allium macrostemon</i>      | MK751472  | Mountain Baohua, Jiangsu | 300         | XFM20180817-2    |
| <i>Allium pallasii</i>         | MN648632  | Urumqi, Xinjiang         | 900         | XFM20180612-3    |
| <i>Allium schoenoprasoides</i> | MN648633  | Khorgos, Xinjiang        | 3000        | XFM20180801-4    |
| <i>Allium songpanicum</i>      | MN648634  | Songpan, Sichuan         | 2700        | XFM20190806-1    |
| <i>Allium tanguticum</i>       | MN648635  | Baiyu, Sichuan           | 3000        | XFM20190820-1    |
| <i>Allium teretifolium</i>     | MN648636  | Tekes, Xinjiang          | 1800        | XFM20180726-1    |

Table S2. Contigs information generated by Novoplasty.

|                            | <i>A. caeruleum</i> | <i>A. delicatulum</i> | <i>A. macrostemon</i> | <i>A. pallasii</i> | <i>A. schoenoprasoides</i> | <i>A. songpanicum</i> | <i>A. tanguticum</i> | <i>A. teretifolium</i> |
|----------------------------|---------------------|-----------------------|-----------------------|--------------------|----------------------------|-----------------------|----------------------|------------------------|
| Total reads                | 16331770            | 16331770              | 16331770              | 16331770           | 16331770                   | 16331770              | 16331770             | 16331770               |
| Aligned reads              | 338998              | 292058                | 240938                | 505350             | 348678                     | 204560                | 164472               | 496734                 |
| Assembled reads            | 308872              | 272528                | 214352                | 469472             | 317174                     | 184650                | 149372               | 471050                 |
| Organelle genome %         | 2.08%               | 1.79%                 | 1.48%                 | 3.09%              | 2.13%                      | 1.25%                 | 1.01%                | 3.04%                  |
| Average organelle coverage | 335                 | 288                   | 238                   | 503                | 345                        | 202                   | 162                  | 489                    |
| Insert range               | 1.9                 | 1.9                   | 1.9                   | 1.9                | 1.9                        | 1.9                   | 1.9                  | 1.9                    |
| Insert range strict        | 1.3                 | 1.3                   | 1.3                   | 1.3                | 1.3                        | 1.3                   | 1.3                  | 1.3                    |
| Subsampled fraction %      | 47.44%              | 31.56%                | 35.39%                | 36.71%             | 44.44%                     | 33.60%                | 38.93%               | 39.72%                 |
| Total contigs              | 3                   | 3                     | 3                     | 3                  | 3                          | 3                     | 3                    | 3                      |
| Largest contig             | 134896 bp           | 135060 bp             | 134980 bp             | 133943 bp          | 134713 bp                  | 135226 bp             | 135125 bp            | 135343 bp              |
| Smallest contig            | 19090 bp            | 18917 bp              | 19112 bp              | 18691 bp           | 19021 bp                   | 19021 bp              | 18892 bp             | 18991 bp               |
| Average insert size        | 303 bp              | 313 bp                | 324 bp                | 346 bp             | 306 bp                     | 316 bp                | 337 bp               | 358 bp                 |

Table S3. The accession number of the other species using in the phylogenetic analysis.

| Name                         | Accession | Name                       | Accession |
|------------------------------|-----------|----------------------------|-----------|
| <i>Allium altaicum</i>       | NC_040972 | <i>Allium oschaninii</i>   | MK411816  |
| <i>Allium cepa</i>           | KM088014  | <i>Allium paradoxum</i>    | NC_039661 |
| <i>Allium chinense</i>       | MK096442  | <i>Allium platyspathum</i> | LT673892  |
| <i>Allium chrysanthum</i>    | MH992108  | <i>Allium prattii</i>      | MG739457  |
| <i>Allium chrysocephalum</i> | NC_042155 | <i>Allium pskemense</i>    | MK411815  |
| <i>Allium fistulosum</i>     | NC_040222 | <i>Allium rude</i>         | NC_042158 |
| <i>Allium herderianum</i>    | MH992110  | <i>Allium tuberosum</i>    | MK335929  |
| <i>Allium maowenense</i>     | MH992111  | <i>Allium ursinum</i>      | MH157875  |
| <i>Allium monanthum</i>      | MH748538  | <i>Allium victorials</i>   | NC_037240 |
| <i>Allium obliquum</i>       | MG670111  | <i>Allium xichuanense</i>  | NC_042159 |

Table S4 RSCU value in eight *Allium* chloroplast genomes CDS.

| AA  | codon | Aca  | Ade  | Ama  | Apa  | Ash  | Aso  | Ata  | Ate  |
|-----|-------|------|------|------|------|------|------|------|------|
| Phe | UUC   | 0.68 | 0.68 | 0.68 | 0.68 | 0.68 | 0.68 | 0.67 | 0.68 |
|     | UUU   | 1.32 | 1.32 | 1.32 | 1.32 | 1.32 | 1.32 | 1.33 | 1.32 |
| Leu | CUG   | 0.43 | 0.45 | 0.43 | 0.42 | 0.42 | 0.43 | 0.44 | 0.43 |
|     | CUC   | 0.54 | 0.51 | 0.51 | 0.53 | 0.53 | 0.54 | 0.52 | 0.53 |
|     | CUA   | 0.69 | 0.64 | 0.67 | 0.67 | 0.69 | 0.68 | 0.68 | 0.68 |
|     | UUG   | 1.39 | 1.41 | 1.37 | 1.39 | 1.38 | 1.37 | 1.36 | 1.37 |
|     | CUU   | 1.39 | 1.45 | 1.43 | 1.41 | 1.42 | 1.41 | 1.41 | 1.43 |
|     | UUA   | 1.56 | 1.53 | 1.59 | 1.57 | 1.56 | 1.58 | 1.6  | 1.57 |
| Ile | AUA   | 0.69 | 0.6  | 0.7  | 0.69 | 0.69 | 0.7  | 0.71 | 0.69 |
|     | AUC   | 0.72 | 0.78 | 0.73 | 0.72 | 0.72 | 0.71 | 0.71 | 0.71 |
|     | AUU   | 1.58 | 1.62 | 1.58 | 1.59 | 1.59 | 1.59 | 1.58 | 1.6  |
| Met | AUG   | 1    | 1    | 1    | 1    | 1    | 1    | 1    | 1    |
| Val | GUC   | 0.64 | 0.66 | 0.63 | 0.64 | 0.63 | 0.61 | 0.61 | 0.63 |
|     | GUG   | 0.65 | 0.66 | 0.63 | 0.65 | 0.65 | 0.65 | 0.64 | 0.66 |
|     | GUA   | 1.02 | 0.98 | 1    | 0.99 | 1    | 1.01 | 1.01 | 1.02 |
|     | GUU   | 1.7  | 1.71 | 1.73 | 1.72 | 1.72 | 1.73 | 1.73 | 1.69 |
| Ser | UCG   | 0.78 | 0.77 | 0.76 | 0.78 | 0.78 | 0.78 | 0.76 | 0.77 |
|     | AGC   | 0.78 | 0.82 | 0.81 | 0.8  | 0.81 | 0.8  | 0.8  | 0.8  |
|     | UCC   | 0.9  | 0.92 | 0.9  | 0.9  | 0.9  | 0.9  | 0.9  | 0.9  |
|     | AGU   | 0.96 | 0.97 | 0.97 | 0.97 | 0.96 | 0.97 | 1    | 0.96 |
|     | UCU   | 1.14 | 1.1  | 1.13 | 1.12 | 1.13 | 1.14 | 1.11 | 1.13 |
|     | UCA   | 1.43 | 1.42 | 1.43 | 1.42 | 1.41 | 1.42 | 1.43 | 1.42 |
| Pro | CCG   | 0.67 | 0.72 | 0.69 | 0.67 | 0.68 | 0.68 | 0.68 | 0.66 |
|     | CCU   | 1.19 | 1.13 | 1.14 | 1.17 | 1.14 | 1.13 | 1.2  | 1.21 |
|     | CCA   | 1.32 | 1.32 | 1.3  | 1.34 | 1.33 | 1.32 | 1.28 | 1.32 |
| Thr | ACC   | 0.79 | 0.85 | 0.84 | 0.81 | 0.82 | 0.81 | 0.83 | 0.82 |
|     | ACG   | 0.79 | 0.81 | 0.78 | 0.78 | 0.78 | 0.78 | 0.77 | 0.8  |
|     | ACU   | 1.09 | 1.06 | 1.07 | 1.07 | 1.09 | 1.08 | 1.1  | 1.07 |
|     | ACA   | 1.33 | 1.28 | 1.31 | 1.34 | 1.31 | 1.32 | 1.3  | 1.31 |
| Ala | GCG   | 0.6  | 0.59 | 0.58 | 0.62 | 0.59 | 0.58 | 0.6  | 0.6  |
|     | GCC   | 0.74 | 0.72 | 0.69 | 0.73 | 0.69 | 0.71 | 0.69 | 0.71 |
|     | GCU   | 1.24 | 1.28 | 1.29 | 1.28 | 1.3  | 1.28 | 1.3  | 1.28 |
|     | GCA   | 1.42 | 1.41 | 1.45 | 1.37 | 1.42 | 1.43 | 1.41 | 1.41 |
| Tyr | UAC   | 0.58 | 0.6  | 0.58 | 0.58 | 0.58 | 0.58 | 0.57 | 0.58 |
|     | UAU   | 1.42 | 1.4  | 1.42 | 1.42 | 1.42 | 1.42 | 1.43 | 1.42 |
| His | CAC   | 0.6  | 0.64 | 0.62 | 0.62 | 0.61 | 0.63 | 0.6  | 0.6  |
|     | CAU   | 1.4  | 1.36 | 1.38 | 1.38 | 1.39 | 1.37 | 1.4  | 1.4  |
| Gly | GGC   | 0.72 | 0.76 | 0.74 | 0.74 | 0.73 | 0.75 | 0.71 | 0.73 |
|     | GGU   | 0.87 | 0.81 | 0.83 | 0.85 | 0.85 | 0.85 | 0.84 | 0.84 |
|     | GGG   | 0.99 | 1.05 | 1.02 | 1    | 0.99 | 1    | 1.02 | 1.03 |
|     | GGA   | 1.42 | 1.38 | 1.41 | 1.4  | 1.43 | 1.4  | 1.43 | 1.4  |

|     |     |      |      |      |      |      |      |      |      |
|-----|-----|------|------|------|------|------|------|------|------|
| Gln | CAG | 0.55 | 0.59 | 0.56 | 0.54 | 0.54 | 0.53 | 0.52 | 0.55 |
|     | CAA | 1.45 | 1.41 | 1.44 | 1.46 | 1.46 | 1.47 | 1.48 | 1.45 |
| Asn | AAC | 0.57 | 0.58 | 0.56 | 0.57 | 0.57 | 0.56 | 0.58 | 0.57 |
|     | AAU | 1.43 | 1.42 | 1.44 | 1.43 | 1.43 | 1.44 | 1.42 | 1.43 |
| Lys | AAG | 0.56 | 0.61 | 0.56 | 0.57 | 0.57 | 0.56 | 0.56 | 0.57 |
|     | AAA | 1.44 | 1.39 | 1.44 | 1.43 | 1.43 | 1.44 | 1.44 | 1.43 |
| Asp | GAC | 0.46 | 0.49 | 0.47 | 0.48 | 0.47 | 0.47 | 0.47 | 0.49 |
|     | GAU | 1.54 | 1.51 | 1.53 | 1.52 | 1.53 | 1.53 | 1.53 | 1.51 |
| Glu | GAG | 0.61 | 0.65 | 0.61 | 0.59 | 0.6  | 0.6  | 0.58 | 0.61 |
|     | GAA | 1.39 | 1.35 | 1.39 | 1.41 | 1.4  | 1.4  | 1.42 | 1.39 |
| Cys | UGC | 0.91 | 0.92 | 0.9  | 0.91 | 0.91 | 0.9  | 0.91 | 0.91 |
|     | UGU | 1.09 | 1.08 | 1.1  | 1.09 | 1.09 | 1.1  | 1.09 | 1.09 |
| Trp | UGG | 1    | 1    | 1    | 1    | 1    | 1    | 1    | 1    |
| Arg | CGC | 0.41 | 0.41 | 0.4  | 0.4  | 0.39 | 0.38 | 0.39 | 0.42 |
|     | CGU | 0.55 | 0.55 | 0.58 | 0.57 | 0.57 | 0.58 | 0.55 | 0.57 |
|     | CGG | 0.6  | 0.65 | 0.62 | 0.62 | 0.63 | 0.63 | 0.6  | 0.64 |
|     | CGA | 0.84 | 0.8  | 0.8  | 0.82 | 0.82 | 0.81 | 0.83 | 0.82 |
|     | AGG | 1.38 | 1.44 | 1.38 | 1.41 | 1.4  | 1.39 | 1.41 | 1.37 |
|     | AGA | 2.22 | 2.15 | 2.23 | 2.18 | 2.19 | 2.21 | 2.22 | 2.18 |
| TER | UAG | 0.73 | 0.73 | 0.71 | 0.73 | 0.73 | 0.72 | 0.74 | 0.72 |
|     | UAA | 1.01 | 1.02 | 1.03 | 1.01 | 1.02 | 1.03 | 1.01 | 1.03 |
|     | UGA | 1.25 | 1.24 | 1.26 | 1.26 | 1.25 | 1.25 | 1.25 | 1.26 |

RSCU represents relative synonymous codon usage. Aca, Ade, Ama, Apa, Ash, Aso, Ata and Ate stand for *A. caeruleum*, *A. delicatulum*, *A. macrostemon*, *A. pallasii*, *A. schoenoprasoides*, *A. songpanicum*, *A. tanguticum* and *A. teretifolium*.

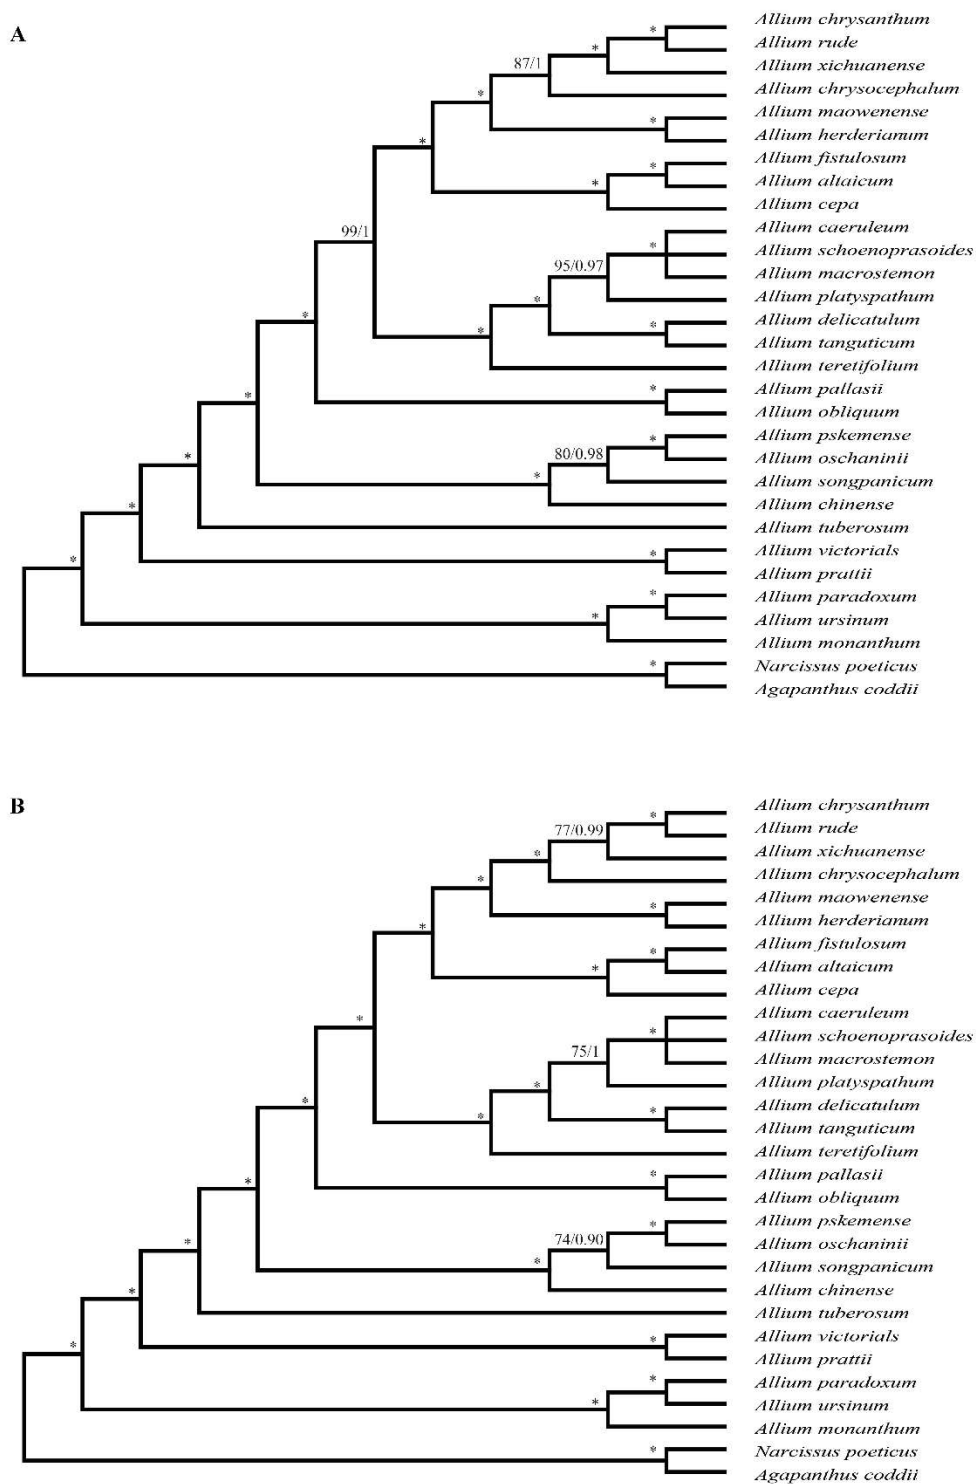

**Figure S 1.** The phylogenetic relationships of these eight *Allium* species with other 22 related species based on combined coding sequences (A) and LSC regions (B). Tree constructed by Bayesian inference (BI) and maximum likelihood (ML) with the posterior probabilities of BI and the bootstrap values of ML above the branches, respectively. \* Represent maximum support in all two analyses.

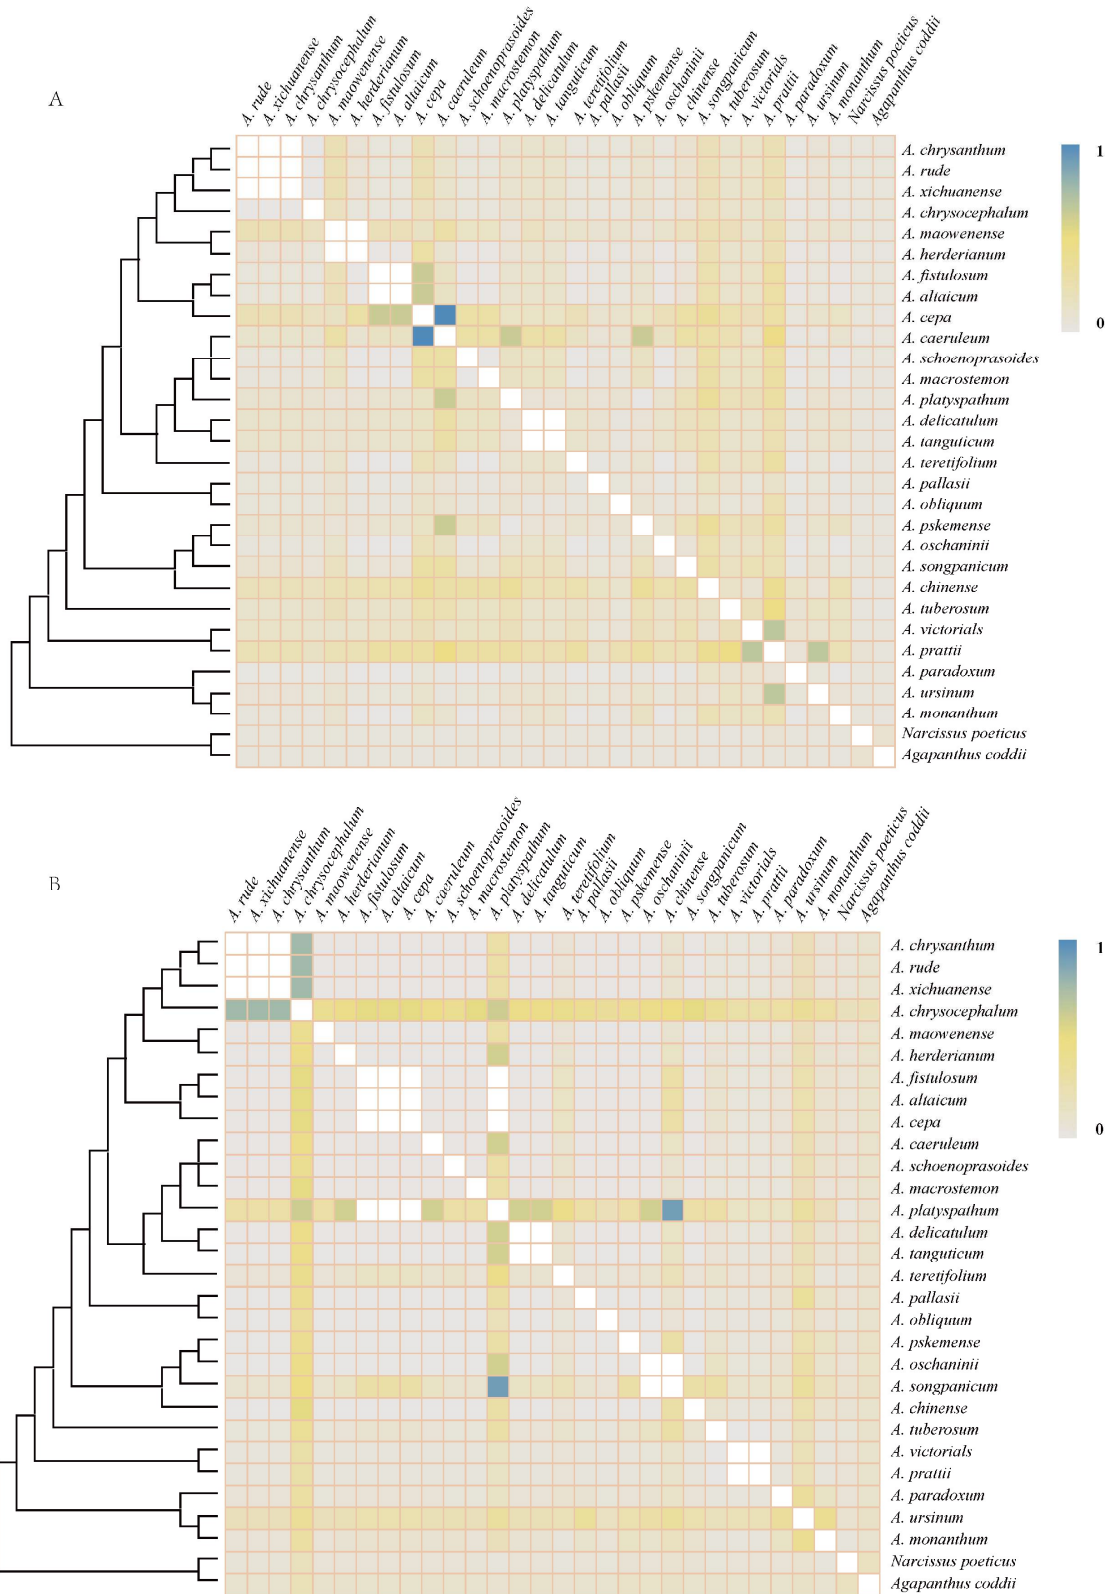

**Figure S 2** Pairwise Ka/Ks ratios of *rbcL* gene in *Allium* (Allioideae) and their outgroups (A). Pairwise Ka/Ks ratios of *clpP* gene in *Allium* (Allioideae) and their outgroups (B).
